# Supplementary material for: On the assessment of the moisture transport by the Great Plains low-level jet
Source: Copernicus journal article supplement (doi:10.5194/esd-2018-76), 2018-10-29
Supplement: Supplementary file 1 [file esd-2018-76-supplement.pdf]

# On the assessment of the moisture transport by the Great Plains low-level jet

Iago Algarra<sup>1</sup>, Jorge Eiras-Barca<sup>1</sup>, Gonzalo Miguez-Macho<sup>2</sup>, Raquel Nieto<sup>1</sup>, and Luis Gimeno<sup>1</sup>

<sup>1</sup>EPHysLab (Environmental Physics Laboratory), Facultade de Ciencias, Universidade de Vigo, Ourense, Galicia, Spain

<sup>2</sup>Non-Linear Physics Group, University of Santiago de Compostela, Galicia, Spain

Correspondence to: Iago Algarra (ialgarra@uvigo.es)

## Supplementary Material

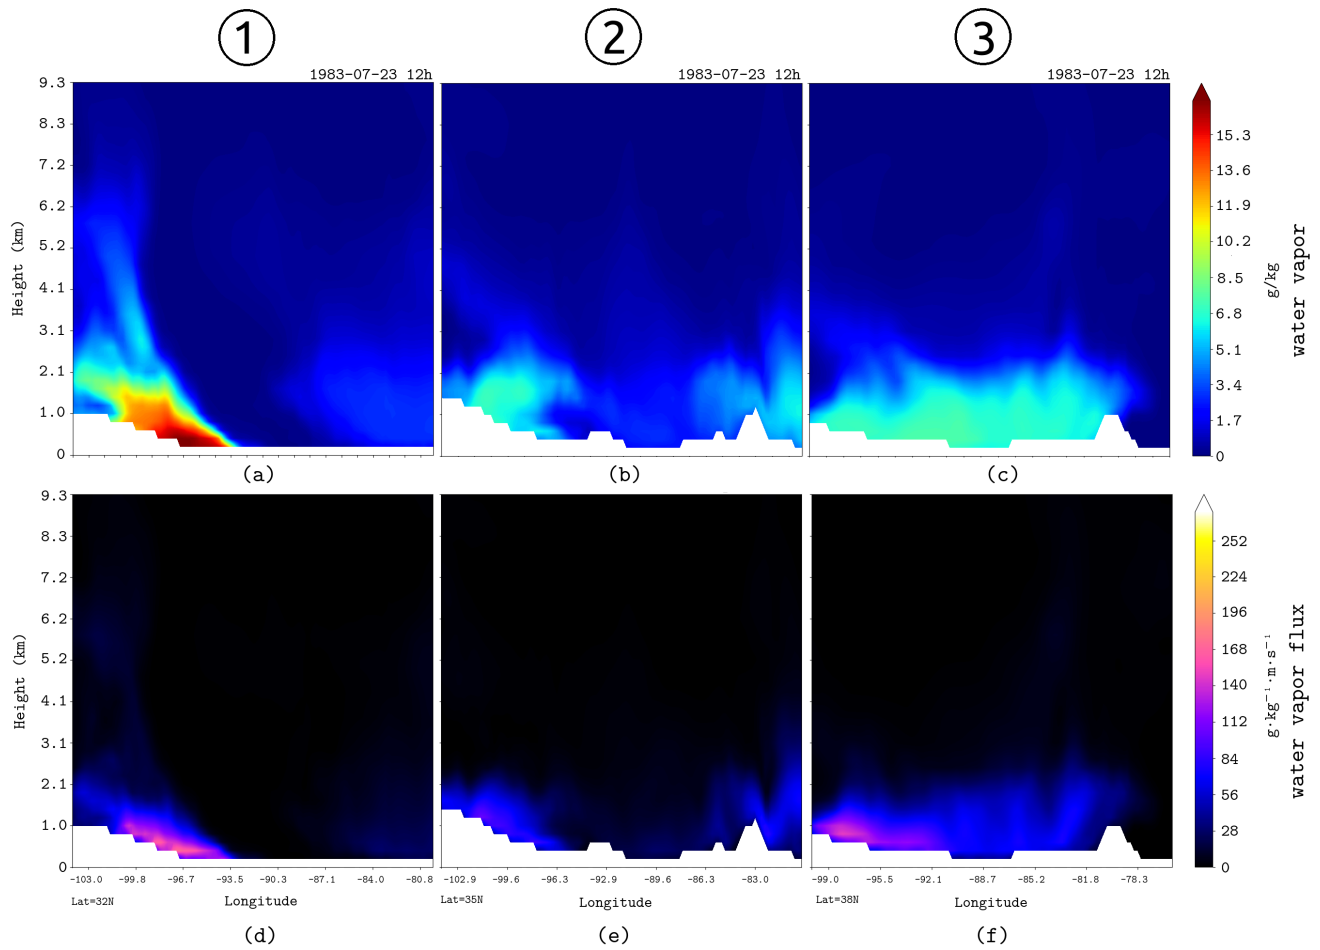

S1: (a-c) qTR in g kg<sup>-1</sup> for the three vertical cross sections at the locations depicted with white lines in Fig. 6. (d-f) same as (a-c) but for  $\phi$ TR in g m (kg s)<sup>-1</sup>.

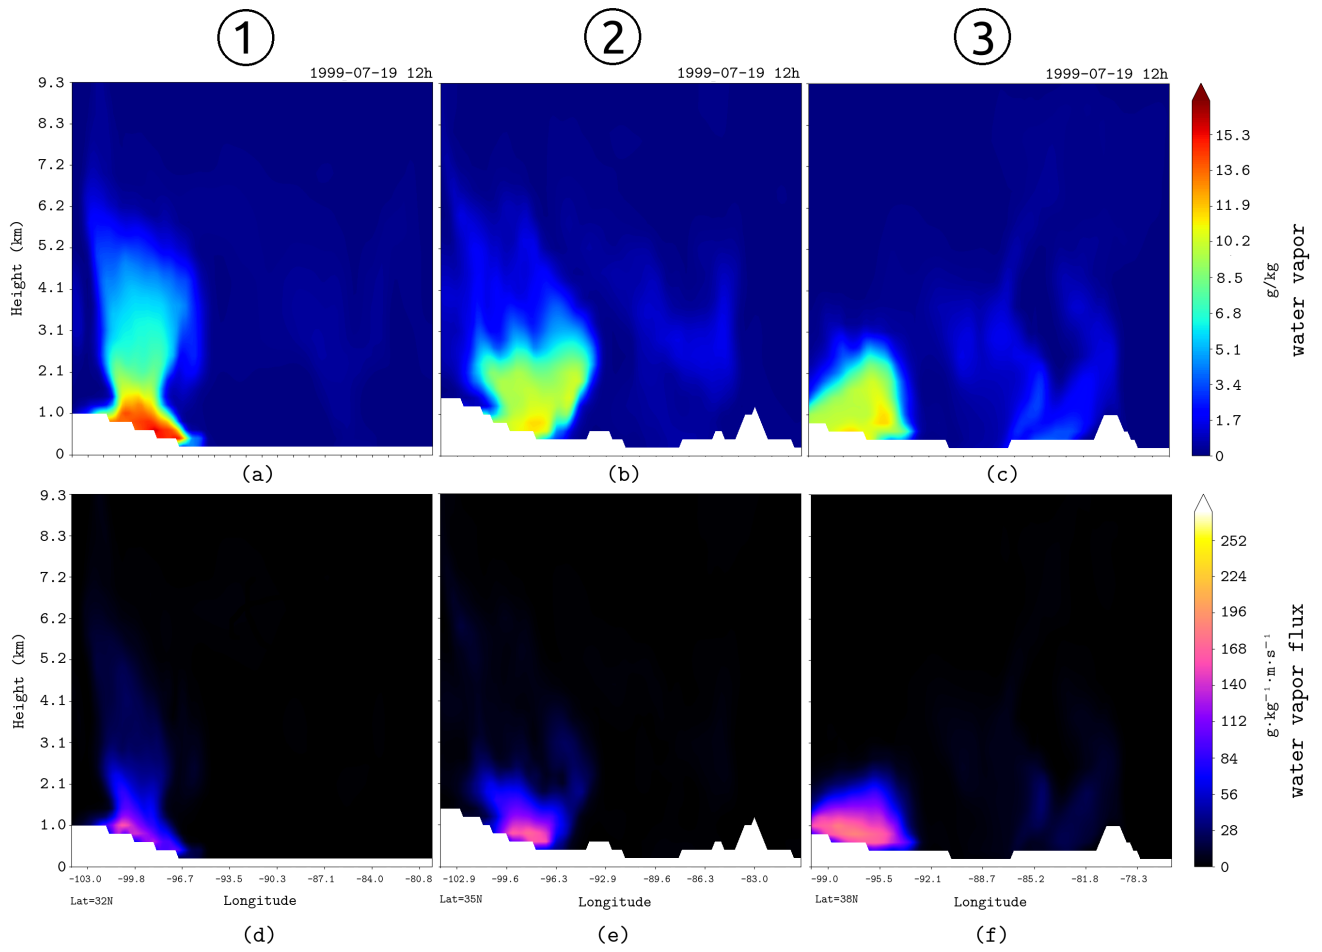

S2: (a-c) qTR in  $\text{g kg}^{-1}$  for the three vertical cross sections at the locations depicted with white lines in Fig. 6. (d-f) same as (a-c) but for  $\phi$ TR in  $\text{g m (kg s)}^{-1}$ .

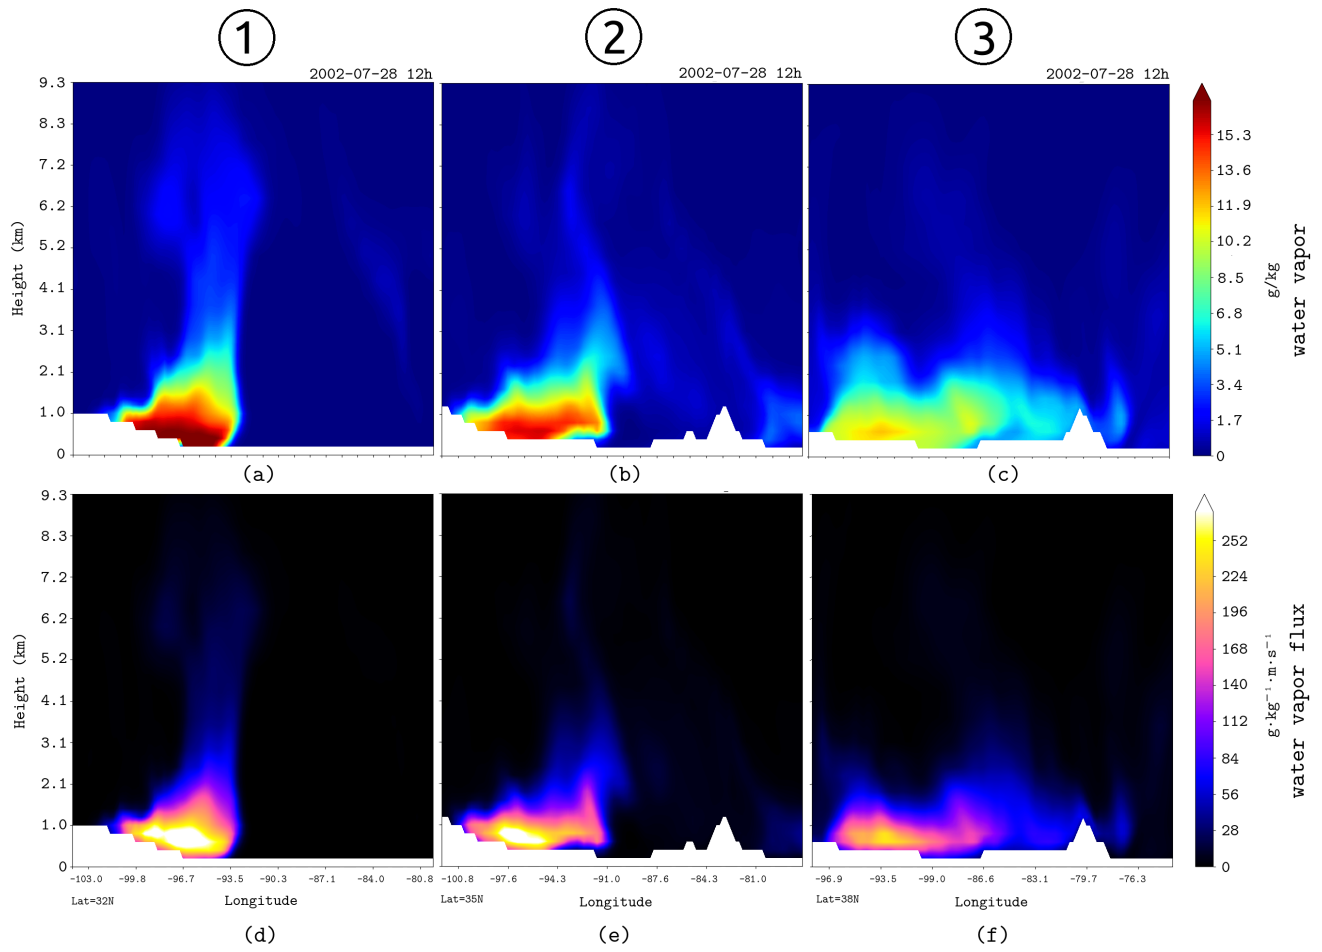

S3: (a-c) qTR in g kg<sup>-1</sup> for the three vertical cross sections at the locations depicted with white lines in Fig. 6. (d-f) same as (a-c) but for  $\phi$ TR in g m (kg s)<sup>-1</sup>.

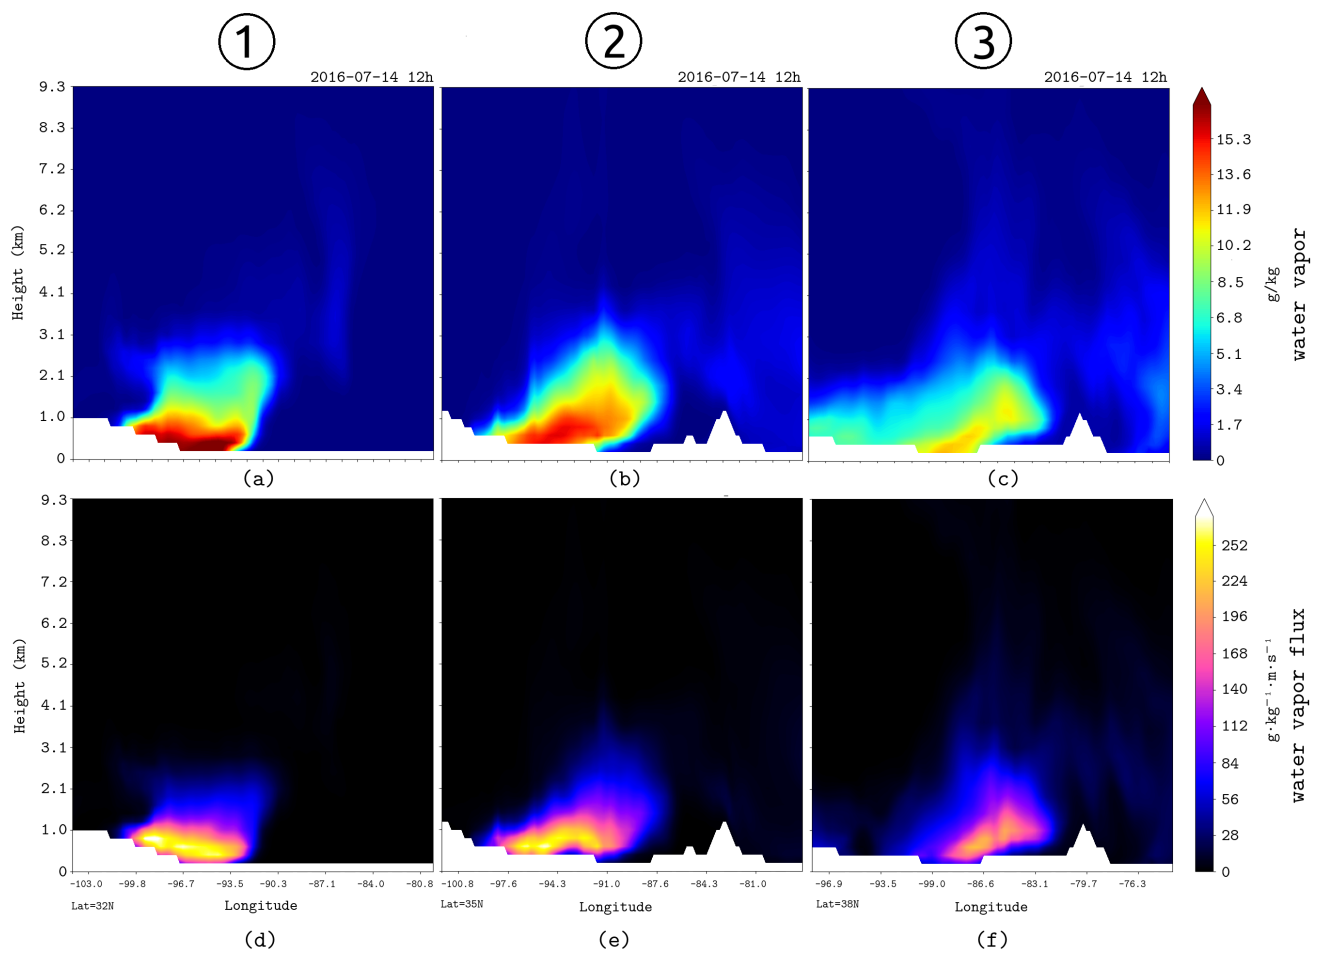

S4: (a-c) qTR in g kg<sup>-1</sup> for the three vertical cross sections at the locations depicted with white lines in Fig. 6. (d-f) same as (a-c) but for  $\phi$ TR in g m (kg s)<sup>-1</sup>.
